# Supplementary material
Source: PubMed Central journal article supplement (PMC7359734)

**Supplemental Figure 1: Case 1 - single nucleotide polymorphism array**

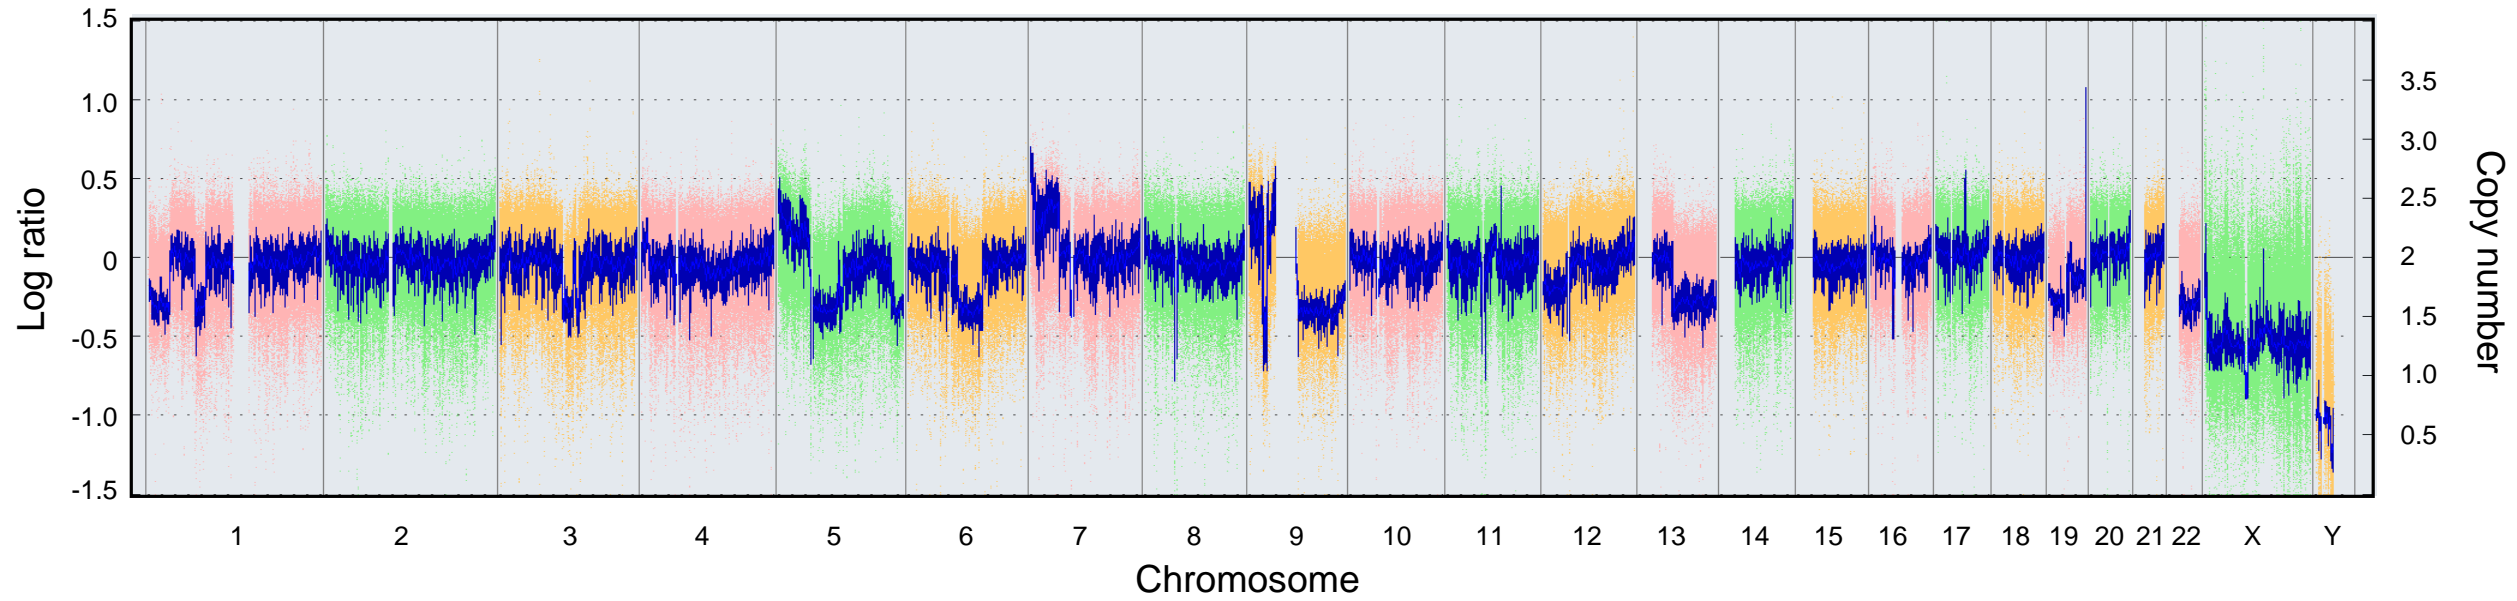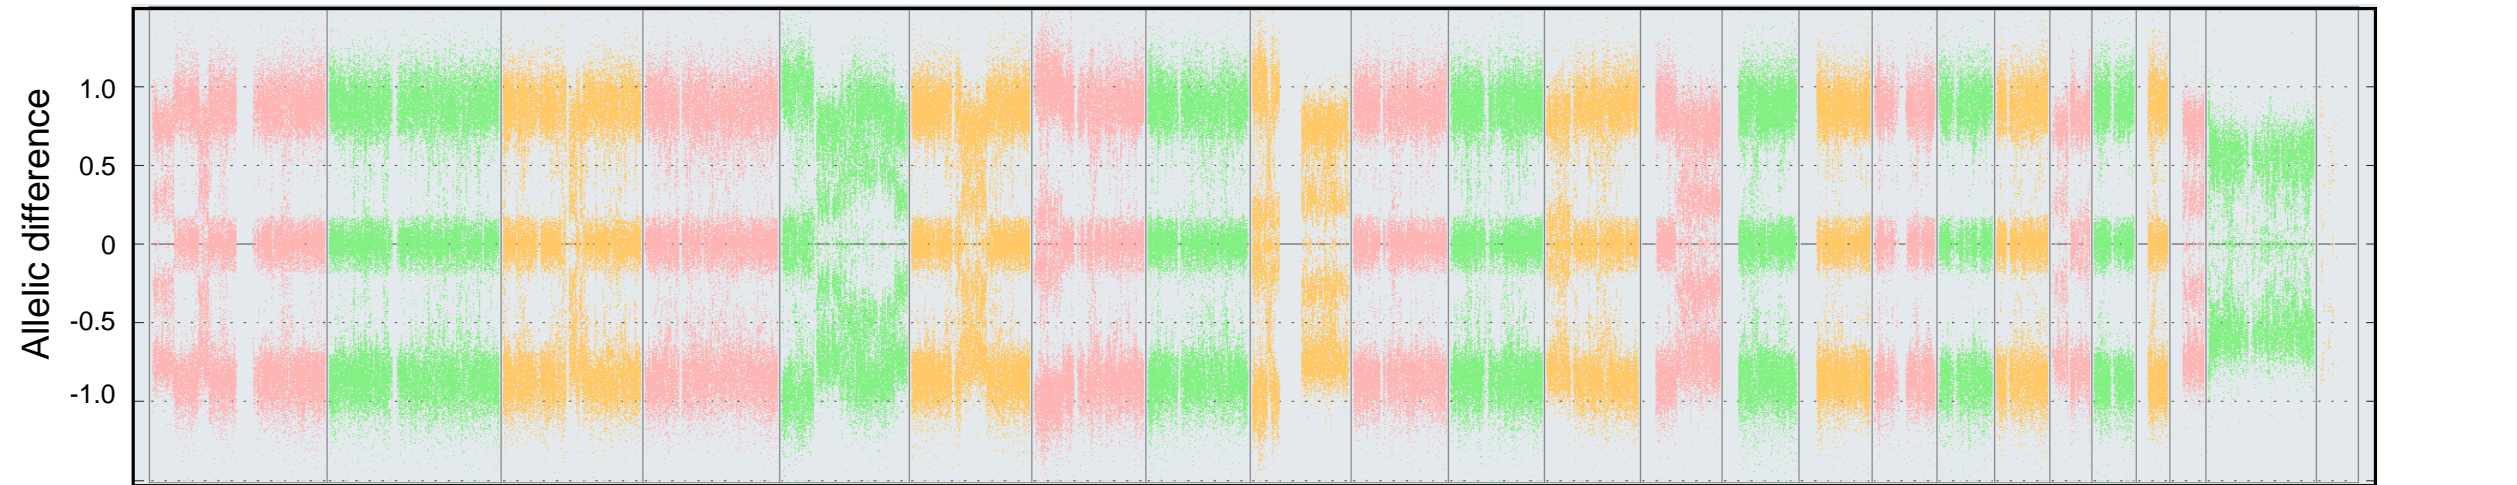

## Supplemental Figure 2: Case 2 - karyotype

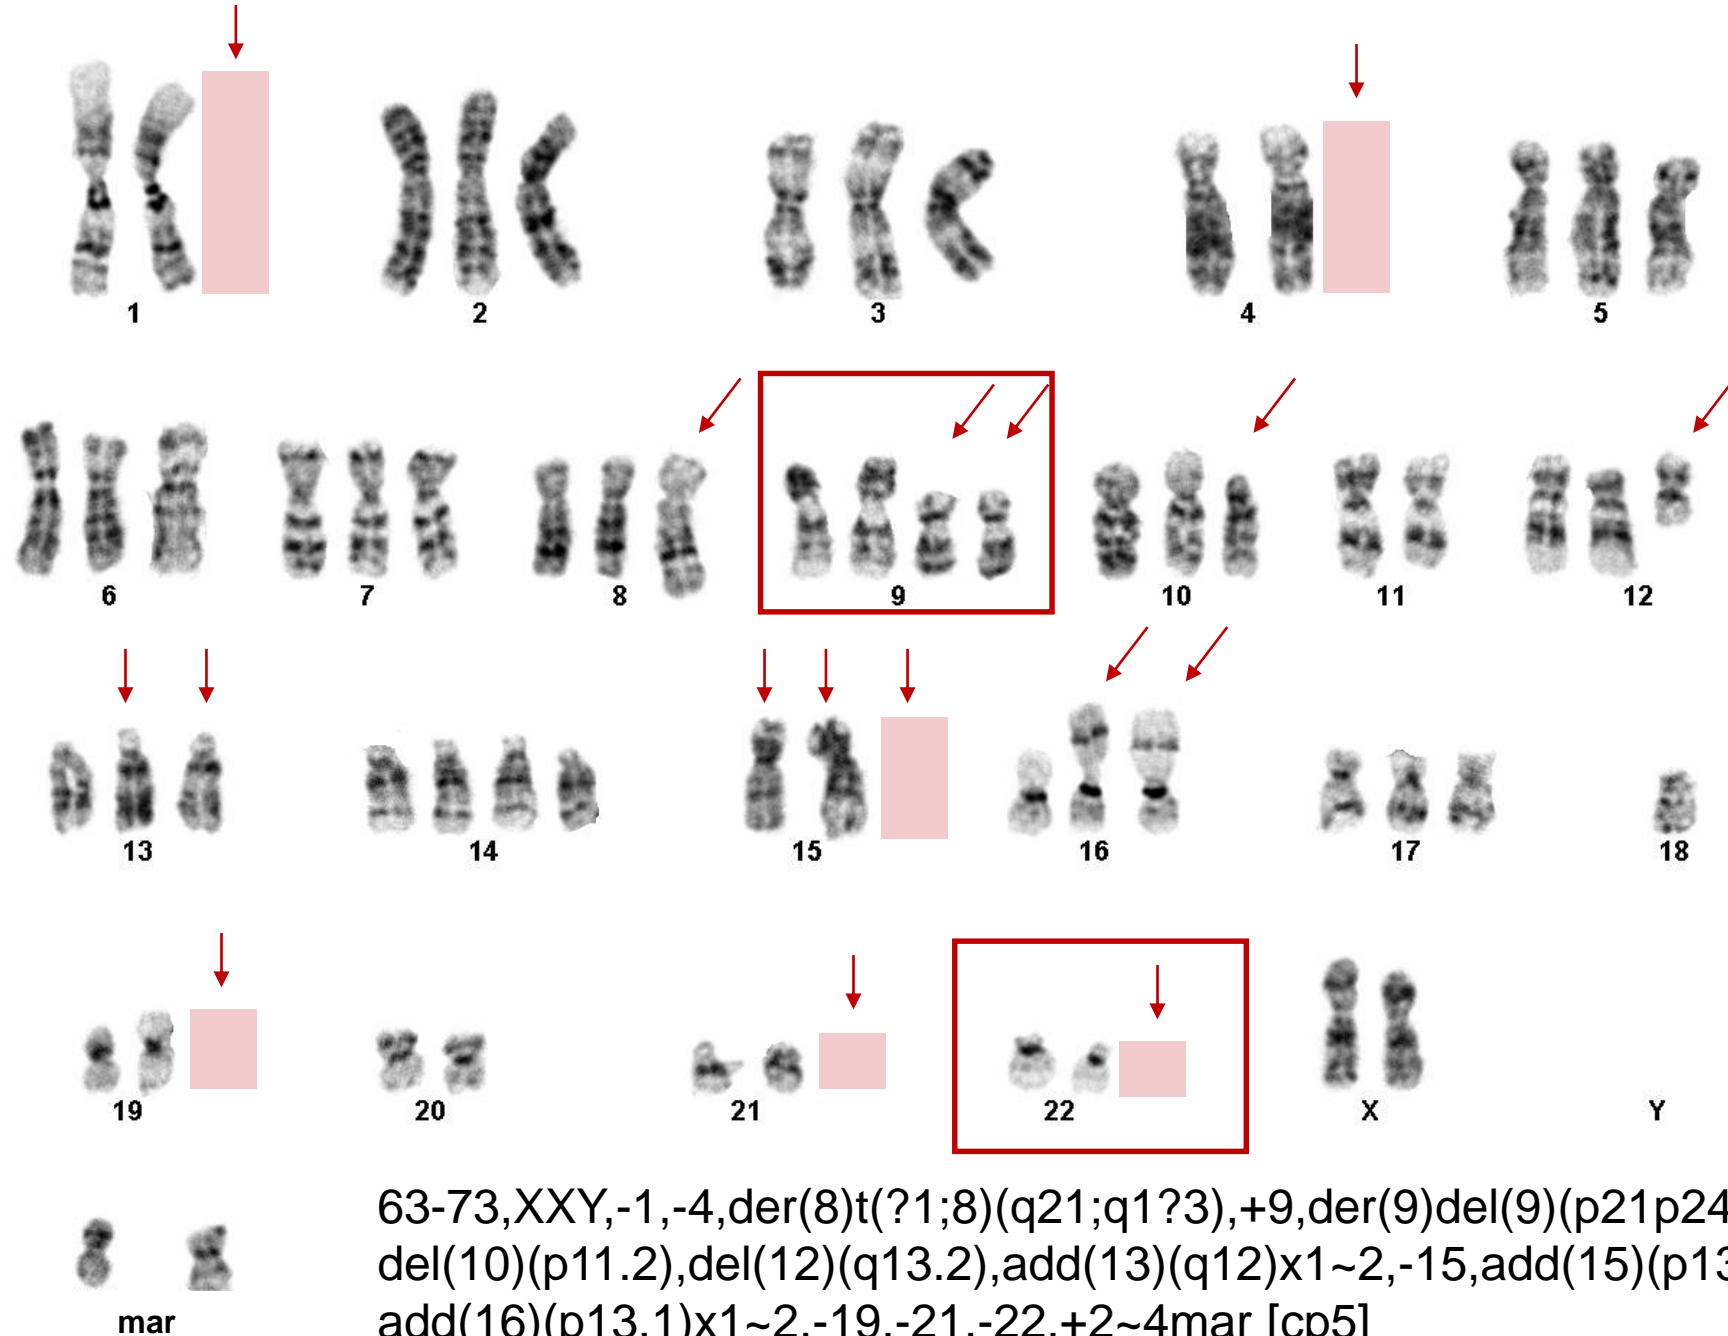

63-73,XXY,-1,-4,der(8)t(?1;8)(q21;q1?3),+9,der(9)del(9)(p21p24)del(9)(q32)x2,  
 del(10)(p11.2),del(12)(q13.2),add(13)(q12)x1~2,-15,add(15)(p13)x1~2,  
 add(16)(p13.1)x1~2,-19,-21,-22,+2~4mar [cp5]



**Supplemental Figure 3: Case 4 - single nucleotide polymorphism array**

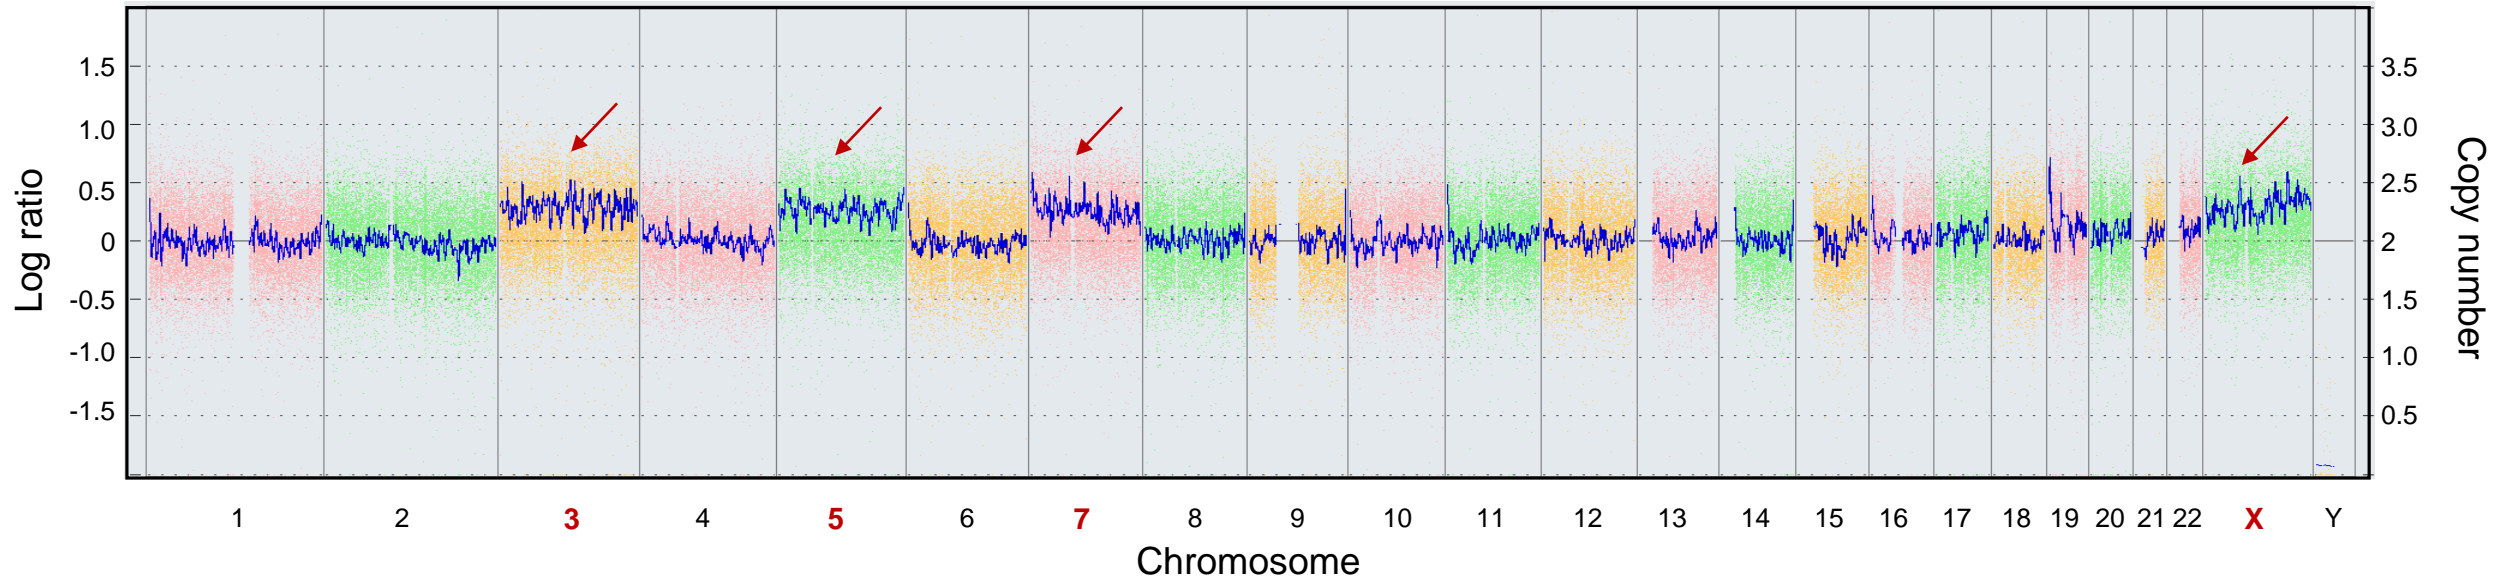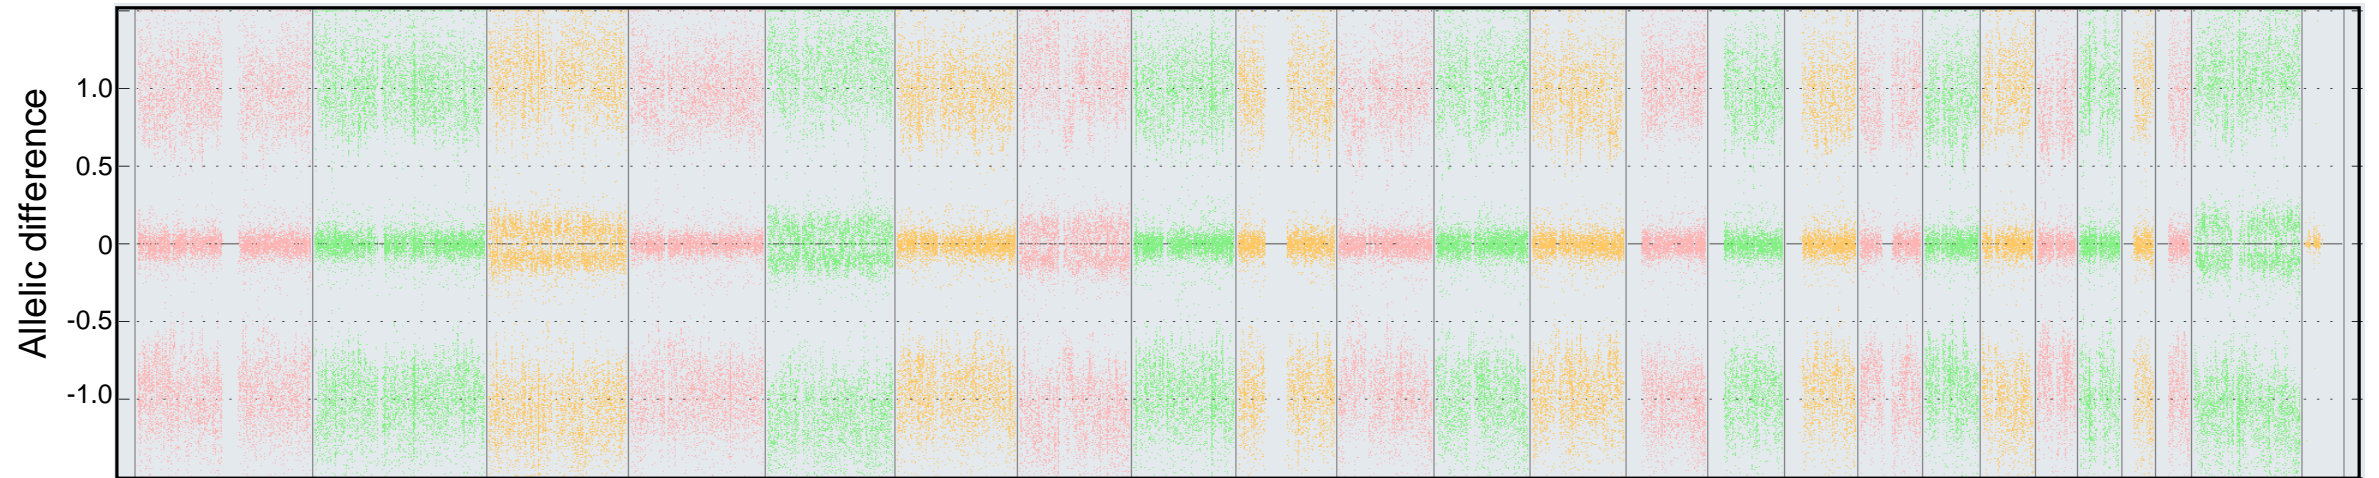

Supplement: NIHMS1595916-supplement-Supplemental_figures_1-3.pdf [file NIHMS1595916-supplement-Supplemental_figures_1-3.pdf]
